# Supplementary material for: Identification of CT Values That Could Be Predictive of Necrosis (N-CTav) in Hepatocellular Carcinoma after Lenvatinib Treatment
Source: MDPI journal article supplement (doi:10.3390/curroncol29050266), 2022-05-04

**Supplementary Table S1.** Clinicopathological characteristics of four HCC cases who underwent hepatectomy after lenvatinib treatment

| Variable                                                                                                                                                                                                                                                                                                                                                                                                                                                                                                              | n=4                    |
|-----------------------------------------------------------------------------------------------------------------------------------------------------------------------------------------------------------------------------------------------------------------------------------------------------------------------------------------------------------------------------------------------------------------------------------------------------------------------------------------------------------------------|------------------------|
| Median age, years                                                                                                                                                                                                                                                                                                                                                                                                                                                                                                     | 68 (65-76)             |
| Sex (Male/Female), n: %                                                                                                                                                                                                                                                                                                                                                                                                                                                                                               | 3/1: 75.0/25.0%        |
| Cause of HCC<br>(HBV/HCV/NBNC), n: %                                                                                                                                                                                                                                                                                                                                                                                                                                                                                  | 1/1/2: 25.0/25/0/50.0% |
| Child-Pugh score 5/6, n: %                                                                                                                                                                                                                                                                                                                                                                                                                                                                                            | 2/2: 50.0/50.0%        |
| mALBI (1/2a/2b)                                                                                                                                                                                                                                                                                                                                                                                                                                                                                                       | 1/2/2                  |
| TKI 1st line / 2nd line~                                                                                                                                                                                                                                                                                                                                                                                                                                                                                              | 4/0: 100/0%            |
| AFP (ng/mL)                                                                                                                                                                                                                                                                                                                                                                                                                                                                                                           | 314.5 (7-35300)        |
| DCP (AU/mL)                                                                                                                                                                                                                                                                                                                                                                                                                                                                                                           | 1354 (8-151000)        |
| Median tumor size (mm)                                                                                                                                                                                                                                                                                                                                                                                                                                                                                                | 96 (53-124)            |
| No. of tumor nodules<br>(solitary/multiple)                                                                                                                                                                                                                                                                                                                                                                                                                                                                           | 2/2: 50.0/50.0%        |
| Differentiation (well/moderate/poor)                                                                                                                                                                                                                                                                                                                                                                                                                                                                                  | 0/3/1: 0/75/25%        |
| MVI, n (%)                                                                                                                                                                                                                                                                                                                                                                                                                                                                                                            | 0 (0.0%)               |
| BCLC stage (A/B/C) n: %                                                                                                                                                                                                                                                                                                                                                                                                                                                                                               | 0/4/0: 0/100.0/0%      |
| TNM stage (II/III/IV) LCSGJ 6th                                                                                                                                                                                                                                                                                                                                                                                                                                                                                       | 2/2/0: 50.0/50.0/0%    |
| HCC, hepatocellular carcinoma; HBV, hepatitis B virus; HCV, hepatitis C virus; NBNC: non-B, non-C (hepatitis B virus surface antigen-negative/hepatitis C virus antibody-negative); ECOG-PS, Eastern Cooperative Oncology Group performance status; MTA, molecular target agents; AFP, alpha-fetoprotein; DCP, des-gamma-carboxy prothrombin; MVI, major venous invasion; BCLC, Barcelona clinic liver cancer; TNM stage, tumor node metastasis stage; LCSGJ 6th, the Liver Cancer Study Group of Japan, 6th edition; |                        |



**Supplementary Table S2.** Clinicopathological characteristics of 15 HCC cases with histopathologically confirmed necrosis in hepatectomy specimens

| Variable                                 | n=15                    |
|------------------------------------------|-------------------------|
| Median age, years                        | 64 (50-83)              |
| Sex (Male/Female), n (%)                 | 13/2: 86.7/13.3%        |
| Cause of HCC (HBV/HCV/NBNC), n           | 3/6/6: 20.0/40.0/40.0%  |
| Child-Pugh score 5/6, n: %               | 9/6: 60.0/40.0%         |
| ECOG-PS (0/1)                            | 15/0: 100/0%            |
| AFP (ng/mL)                              | 11.0 (2.4-627.0)        |
| DCP (AU/mL)                              | 56 (17-82700)           |
| Median tumor size (mm)                   | 70.5 (54-86)            |
| No. of tumor nodules (solitary/multiple) | 11/4: 73.3/26.7%        |
| Differentiation (well/moderate/poor)     | 0/0/15: 0/0/100.0%      |
| MVI, n (%)                               | 1 (6.7%)                |
| BCLC stage (A/B/C)                       | 2/12/1: 13.3/80.0/6.7%  |
| TNM stage (II/III/IV) LCSCJ 6th          | 10/4/1: 66.7/26.7//6.7% |

HCC, hepatocellular carcinoma; HBV, hepatitis B virus; HCV, hepatitis C virus; NBNC, non-B, non-C (hepatitis B virus surface antigen-negative/hepatitis C virus antibody-negative); ECOG-PS, Eastern Cooperative Oncology Group performance status; TKI, tyrosine kinase inhibitor; AFP, alpha-fetoprotein; DCP, des-gamma-carboxy prothrombin; MVI, major venous invasion; BCLC, Barcelona clinic liver cancer; TACE, transcatheter arterial chemoembolization; TNM stage, tumor node metastasis stage; LCSCJ 6th, the Liver Cancer Study Group of Japan, 6th edition



## Supplementary Figure S1

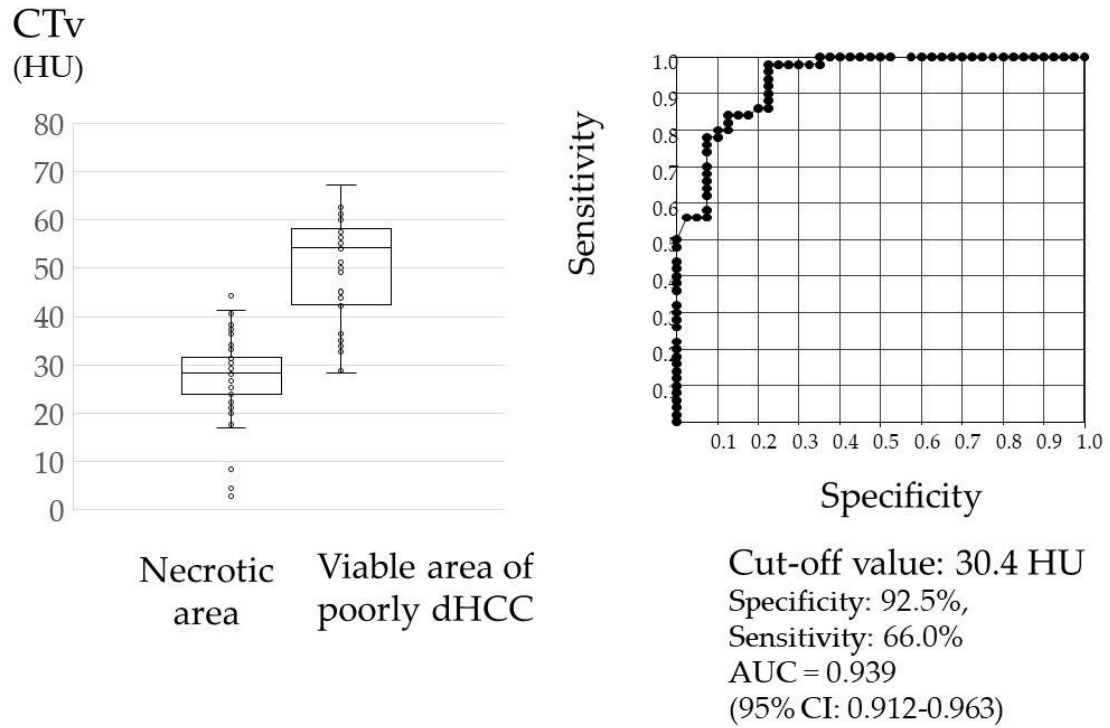

Supplement: s1 [file s1]
